# Supplementary material
Source: PubMed Central journal article supplement (PMC2829852)
Supplement: NIHMS152202-supplement-01.pdf [file NIHMS152202-supplement-01.pdf]

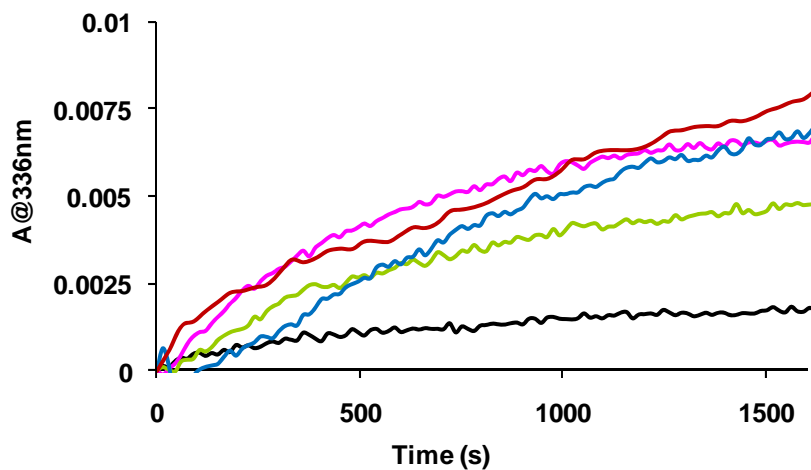

**Figure S1: Absorbance at 336nm detected during the reaction of different thiols (50 $\mu$ M) with DEA/NO (50 $\mu$ M) as a function of time. Black: DEA/NO alone, pink, green, blue, and red: DEA/NO and cysteine, GSH, bovine serum albumin (BSA), and human serum albumin (HSA), respectively.**
